# Supplementary material for: Development and psychometric validation of a survey assessing barriers to mental health help- seeking among men: A cross-sectional study
Source: Research Square preprint supplement (doi:10.21203/rs.3.rs-7053007/v1), 2025-07-28
Supplement: Supplementary file 1 [file 9f2720b7389657fdf0b3c883.docx]

**Survey on Barriers to Men Seeking Mental Health Help**

*Section 1: Demographic Information*

1. Age:

- [ ] 18-24

- [ ] 25-34

- [ ] 35-44

- [ ] 45-54

- [ ] 55-64

- [ ] 65+

1. Ethnicity:

- [ ] White

- [ ] Black or African American

- [ ] Asian

- [ ] Hispanic or Latino

- [ ] Native American or Alaska Native

- [ ] Native Hawaiian or Pacific Islander

- [ ] Other

1. Education Level:

- [ ] No formal education

- [ ] High school diploma or equivalent

- [ ] Some college

- [ ] Associate degree

- [ ] Bachelor’s degree

- [ ] Master’s degree

- [ ] Doctorate or higher

1. Employment Status:

- [ ] Employed full-time

- [ ] Employed part-time

- [ ] Self-employed

- [ ] Unemployed

- [ ] Student

- [ ] Retired

- [ ] Other (please specify): ____________

- [ ] Prefer not to say

1. Annual Income Level:

- [ ] Below $20,000

- [ ] $20,000 - $39,999

- [ ] $40,000 - $59,999

- [ ] $60,000 - $79,999

- [ ] $80,000 - $99,999

- [ ] $100,000 and above

- [ ] Prefer not to say

1. Relationship Status:

- [ ] Single

- [ ] Married

- [ ] In a relationship

- [ ] Divorced

- [ ] Widowed

- [ ] Prefer not to say

1. Sexual Orientation:

- [ ] Heterosexual

- [ ] Homosexual

- [ ] Bisexual

- [ ] Pansexual

- [ ] Asexual

- [ ] Other (please specify): ____________

- [ ] Prefer not to say

1. Geographic Location:

- [ ] Urban

- [ ] Suburban

- [ ] Rural

- [ ] Prefer not to say

*Section 2: Awareness and Perceptions*

1. How easy or difficult do you think it would be to access mental health services in your community?

- [ ] Very difficult

- [ ] Slightly difficult

- [ ] Uncertain

- [ ] Slightly easy

- [ ] Very easy

- [ ] Prefer not to say

1. How did you learn about these services? (Select all that apply)

- [ ] Friends/Family

- [ ] Internet

- [ ] Healthcare providers

- [ ] Media

- [ ] Workplace

- [ ] Other

- [ ] Prefer not to say

1. How important is mental health compared to physical health for you?

- [ ] Much less important

- [ ] A little less important

- [ ] Equal importance

- [ ] A little more important

- [ ] Much more important

- [ ] Prefer not to say

1. Do you believe there are stigmas surrounding men seeking mental health help?

- [ ] Yes

- [ ] No

- [ ] Prefer not to say

1. To what extent do you feel societal expectations of masculinity influence men’s decisions to seek or not seek mental health help?

- [ ] Not at all

- [ ] Slightly

- [ ] Moderately

- [ ] Heavily

- [ ] Uncertain

- [ ] Prefer not to say

1. How comfortable would you be discussing mental health issues with a family member?

- [ ] Very Uncomfortable

- [ ] Uncomfortable

- [ ] Neutral

- [ ] Comfortable

- [ ] Very Comfortable

- [ ] Prefer not to say

1. How comfortable would you be discussing mental health issues with a friend?

- [ ] Very Uncomfortable

- [ ] Uncomfortable

- [ ] Neutral

- [ ] Comfortable

- [ ] Very Comfortable

- [ ] Prefer not to say

*Section 3: Personal Experiences*

1. Have you ever encountered mental health challenges that impacted your daily life?

- [ ] Yes

- [ ] No

- [ ] Uncertain

- [ ] Prefer not to say

1. If yes, did you seek help?

- [ ] Yes

- [ ] No

- [ ] Prefer not to say

1. If you did not seek help, what were the reasons? (Select all that apply)

- [ ] Financial constraints

- [ ] Self-reliance

- [ ] Distrust of mental health professionals

- [ ] Lack of time

- [ ] Fear of judgement

- [ ] Unaware of where to find help

- [ ] Other

- [ ] I did seek help

- [ ] Prefer not to say

1. How likely is it that you would seek mental health help in the future if needed?

- [ ] Very Unlikely

- [ ] Unlikely

- [ ] Neutral

- [ ] Likely

- [ ] Very Likely

- [ ] Prefer not to say

*Section 4: Specific Barriers*

1. If you have had any previous experiences involving mental health professionals, how would you rate your overall experiences.

- [ ] Extremely Negative

- [ ] Negative

- [ ] Neutral

- [ ] Positive

- [ ] Very Positive

- [ ] Have not had any previous experiences

- [ ] Prefer not to say

1. Have your prior experiences with mental health professionals affected your mental health help seeking?

- [ ] Yes

- [ ] No

- [ ] Prefer not to say

1. Have any of the following beliefs or societal pressures affected your decisions regarding mental health care? (Select all that apply)

- [ ] Being seen as weak or vulnerable

- [ ] Feeling the need to rely on self

- [ ] Fearing stigmas

- [ ] Being seen as unmanly

- [ ] Pressure to conform to masculine norms

- [ ] Cultural or familial expectations

- [ ] Other

- [ ] None

- [ ] Prefer not to say

1. Have financial considerations impeded your decisions to seek mental health help?

- [ ] Yes

- [ ] No

- [ ] Prefer not to say

1. How accessible do you believe the mental health services in your area are?

- [ ] Inaccessible

- [ ] Not very accessible

- [ ] Accessible

- [ ] Very accessible

- [ ] Uncertain

- [ ] Prefer not to say

1. How available do you believe the mental health services in your area are?

- [ ] Unavailable

- [ ] Not very available

- [ ] Available

- [ ] Very available

- [ ] Uncertain

- [ ] Prefer not to say

1. How much impact have cultural beliefs had on your seeking out mental health help?

- [ ] No impact

- [ ] Very little impact

- [ ] Some impact

- [ ] Very large impact

- [ ] Uncertain

- [ ] Prefer not to say

*Conclusion*

Thank you for participating in this survey. Your responses will help us understand the barriers men face when seeking mental health help and develop strategies to overcome these obstacles.
